1 Chronic aromatase inhibition increases ventral hippocampal neurogenesis in middle-aged female  
2 mice

3

4

5 Jessica A Chaiton<sup>a,c,d</sup>, Sarah J Wong<sup>a,d</sup>, Liisa AM Galea<sup>a,b,d</sup>

6

7 a) Department of Psychology, University of British Columbia, 2136 West Mall,  
8 Vancouver, BC, V6T 1Z4

9 b) Graduate Program in Neuroscience, University of British Columbia

10 c) MD Undergraduate Program, Faculty of Medicine, University of British Columbia

11 d) Djavad Mowafaghian Centre for Brain Health, 2215 Wesbrook Mall, Vancouver,  
12 BC, V6T 1Z3, Canada

13

14

15 Corresponding Author:

16

17 Dr. Liisa Galea

18 Djavad Mowafaghian Centre for Brain Health

19 University of British Columbia

20 2215 Wesbrook Mall

21 Vancouver, BC

22 Canada, V6T 1Z3

23 Tel: +1 (604) 822 6536

24 Email: [liisa.galea@ubc.ca](mailto:liisa.galea@ubc.ca)

25

26

27

28 Abstract

29

30       Letrozole, a third-generation aromatase inhibitor, prevents the production of estrogens in  
31 the final step in conversion from androgens. Due to its efficacy at suppressing estrogens,  
32 letrozole has recently taken favor as a first-line adjuvant treatment for hormone-responsive breast  
33 cancer in middle-aged women. Though patient response to letrozole has generally been positive,  
34 there is conflicting evidence surrounding its effects on the development of depression. It is  
35 possible that the potential adverse effects of letrozole on mood are a result of the impact of  
36 hormonal fluctuations on neurogenesis in the hippocampus. Thus, to clarify the effects of  
37 letrozole on the hippocampus and behavior, we examined how chronic administration affects  
38 hippocampal neurogenesis and depressive-like behavior in middle-aged, intact female mice.  
39 Mice were given either letrozole (1mg/kg) or vehicle by injection (i.p.) daily for 3 weeks.  
40 Depressive-like behavior was assessed during the last 3 days of treatment using the forced swim  
41 test, tail suspension test, and sucrose preference test. The production of new neurons was  
42 quantified using the immature neuronal marker doublecortin (DCX), and cell proliferation was  
43 quantified using the endogenous marker Ki67. We found that letrozole increased DCX and Ki67  
44 expression and maturation in the dentate gyrus, but had no significant effect on depressive-like  
45 behavior. Our findings suggest that a reduction in estrogens in middle-aged females increases  
46 hippocampal neurogenesis without any adverse impact on depressive-like behavior; as such, this  
47 furthers our understanding of how estrogens modulate neurogenesis, and to the rationale for the  
48 utilization of letrozole in the clinical management of breast cancer.

49

50

51 Keywords: Letrozole; estrogens; depression; neurogenesis; hippocampus; middle-aged females;  
52 Ki67; doublecortin

53

54

## 55 1. Introduction

56

57 Estrogen-suppressive therapy is a common and effective adjuvant treatment of hormone-  
58 responsive breast cancer in postmenopausal women. Letrozole, a non-steroidal aromatase  
59 inhibitor (AI) that prevents the conversion of androgens into estrogens in the final steps of the  
60 estrogen-synthesis pathway, is a first-line treatment of choice. Despite its demonstrated benefits  
61 on breast cancer progression, there is conflicting clinical and pre-clinical evidence regarding its  
62 adverse effects on mood and cognition. Recently, the effects of letrozole on cognition have  
63 attracted more attention, but the evidence for its effects on depression is less understood. Both  
64 clinical and pre-clinical trials have found opposing effects of letrozole on mood and behavior  
65 (Borbélyová et al., 2017; Chang et al., 2015; Kokras et al., 2018, 2014; Meng et al., 2011). Most  
66 animal studies to date have used rodents of varying ages, gonadal hormone status, sex, and  
67 duration of treatment, resulting in conflicting data that are poorly understood.

68 Women are susceptible to developing depression during times of dramatic hormone  
69 fluctuations such as postpartum and perimenopause. Suppression of ovarian hormones can  
70 induce a depressive-like phenotype in women and rodents (Frokjaer et al., 2015; Mahmoud et al.,  
71 2016a), suggesting that a reduction in estrogens renders females more susceptible to depression.  
72 Thus, it is possible that the adverse effects of letrozole on mood may be a result of its action on  
73 suppressing estrogens.

74 The hippocampus has a high concentration of estrogen receptors, and is a region that is  
75 implicated in the pathoetiology of depression. Estrogens modulate adult hippocampal  
76 neurogenesis, with chronic exposure suppressing neurogenesis independent of its effects on  
77 upregulating cell proliferation (Mahmoud et al., 2016b). Decreased hippocampal neurogenesis is  
78 seen in depressed patients and in animal models of depression, which is restored with  
79 antidepressant treatment (Boldrini et al. 2012, Green and Galea, 2008, Mahmoud et al., 2016a).  
80 Furthermore, androgens enhance hippocampal neurogenesis in adult male rodents (Hamson et  
81 al., 2013) but it is not known whether androgens can modulate neurogenesis in females.  
82 Additionally, letrozole modulates cell proliferation in hippocampal dispersion cultures in-vitro  
83 from postnatal day 5 rats (Fester et al., 2006). It is possible that changes in neuroplasticity serve  
84 as a neural basis for local estrogens to exert their effects on mood. Therefore, we sought to  
85 investigate the effects of estrogen suppression due to chronic letrozole treatment on depressive-  
86 like behavior and hippocampal neurogenesis in middle-aged female mice.

87

88

## 89 2. Methods

90

### 91 2.1 Subjects

92

93 Nineteen C57/Bl6J female mice 10-12 months of age were obtained from the Animal  
94 Care Centre at the University of British Columbia. All animals were maintained on a 12h  
95 light/dark cycle (lights on at 07:00h), group housed (2-3) and given ad libitum access to food  
96 (Purina chow) and water. All procedures were performed in accordance with ethical guidelines  
97 set by the Canadian Council on Animal Care, and approved by the Animal Care Committee at  
98 the University of British Columbia.

99

### 100 2.2 Drug preparation and treatment

101  
102  
103  
104  
105  
106  
107  
108  
109  
110  
111  
112  
113  
114  
115  
116  
117  
118

All animals received daily intraperitoneal (i.p.) injections of 1mg/kg letrozole or saline vehicle for 21 days (see Fig. 1A; dose chosen due to Aydin et al., 2008, Kokras et al., 2014, 2018). Letrozole was dissolved in 0.9% saline at 0.1mg/mL, dissolved with aid of ultrasonic bath. We chose to give i.p. injections rather than oral administration and it is important to acknowledge that route of administration can influence neural and behavioral consequences of drug treatment. However, injections are more likely to give consistent drug quantities compared to oral routes of administration (Kott et al., 2016; Ingberg et al., 2012; Pawluski et al 2014), thereby ensuring accurate dosing.

### 2.3 Behavioral Testing

Behavioral Testing occurred during days 18-20 of 21 days of letrozole or saline treatment, with the exception of the Sucrose Preference Test, which was administered weekly. A timeline of the procedures is shown in Figure 1A.

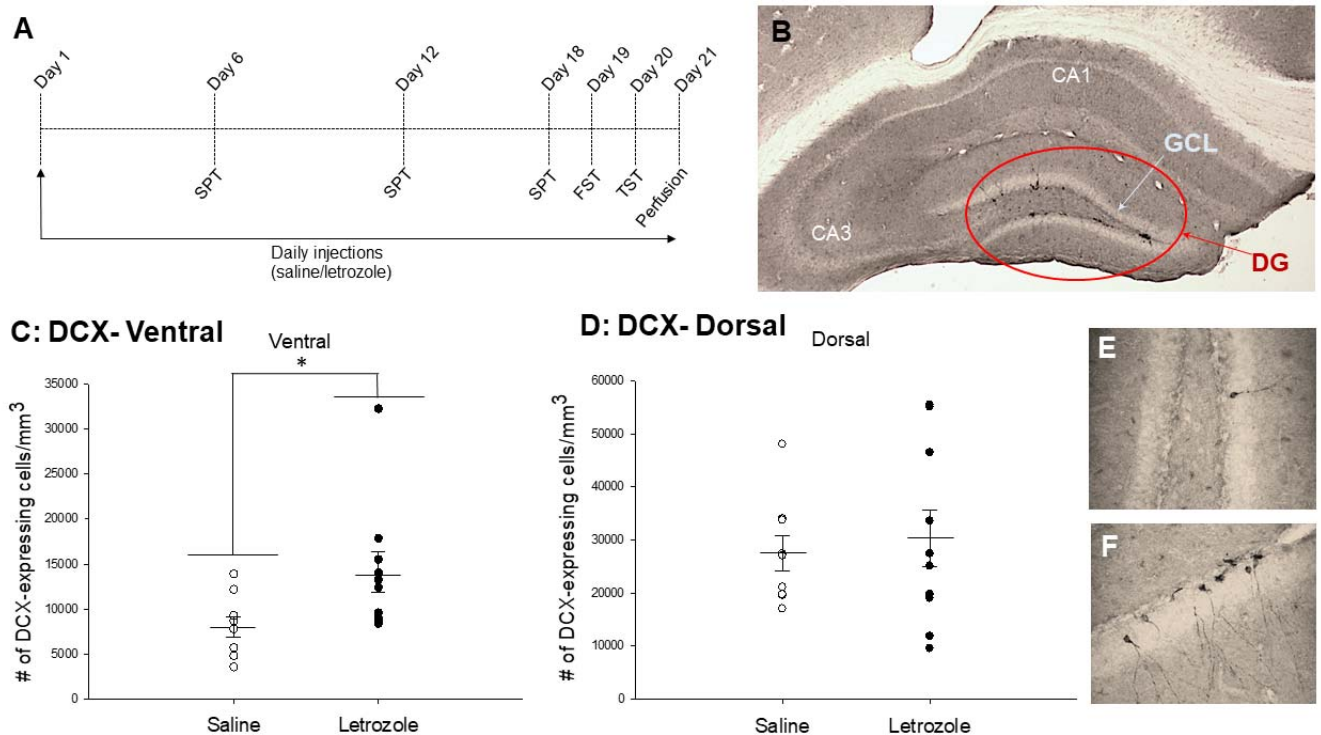

119  
120  
121  
122  
123  
124  
125  
126  
127

**Figure 1:** A) Experimental timeline. B) Photomicrograph of the hippocampal region being analyzed viewed at 40x magnification. GCL: granule cell layer. DG: dentate gyrus. C and D) Mean density of doublecortin (DCX)-expressing cells in the dentate gyrus (DG). Letrozole significantly increased the density of DCX-expressing cells in the ventral region (C), but not dorsal (D). E-F) Representative photomicrographs of DCX-expressing cells, viewed at 400X magnification. FST: forced swim test; TST: tail suspension test; SPT sucrose preference test.

## 128 Forced Swim Test (FST) and Tail Suspension Test (TST)

129

130 FST and TST were conducted as described previously (Can et al. 2011; Can et al. 2012;  
131 Saeedi Saravi et al., 2016). Each mouse was subjected to a single 6-minute FST and TST session  
132 on separate days. FST was conducted in a vertical glass beaker (30cm height x 20cm diameter)  
133 filled with clean water (24°C) at a depth of 15cm. In the TST session, mice were suspended by  
134 their tails above the ground with a 17cm strip of tape within a 3-walled rectangular chamber.  
135 Both tests were videotaped and scored using BEST collection software (Educational Consulting,  
136 Hobe Sound, FL, USA) by an individual blind to treatment condition. Percent time spent in  
137 mobile and immobile behaviors were analyzed, excluding the first two minutes (Can et al.,  
138 2011).

139

## 140 Sucrose Preference Test (SPT)

141

142 Each mouse was habituated to a 1% sucrose solution and the two-bottle procedure by  
143 introducing two identical bottles with water and 1% sucrose (counterbalanced) into their home  
144 cage for a 48h period. After acclimatization, the test was administered for three days before the  
145 start of treatment (baseline) and then once a week for 3 weeks over the course of letrozole  
146 treatment as previously done (Gross and Pinhasov, 2016; Mahmoud et al. 2016 ; Strekalova et al.  
147 2006; Wainwright et al. 2016). Briefly, mice were single housed and simultaneously food and  
148 water deprived for 4h. Mice were then presented with 2 bottles for 12h between 20:00h and  
149 08:00h, after which they were re-paired with cage mates. Sucrose preference was calculated  
150 using the formula: sucrose preference=(sucrose consumed/(sucrose + water consumed))x100.  
151

151

## 152 2.4 Tissue Collection

153

154 Twenty-four hours after TST, mice were given an overdose of sodium pentobarbital, and  
155 blood was collected by cardiac puncture. Mice were transcardially perfused with 0.9% saline  
156 followed by 4% paraformaldehyde. Brains were extracted and post-fixed in paraformaldehyde  
157 overnight at 4°C. Brains were transferred to 30% sucrose and stored at 4°C. Brains were sliced in  
158 30µm coronal sections using a Leica SM2000R microtome (Richmond Hill, Ontario, Canada).  
159 Sections were stored in antifreeze (20% glycerol and 30% ethylene glycol in 0.1M PBS) at -  
160 20°C until processing.

161

## 162 2.5 Doublecortin (DCX) Immunohistochemistry

163

164 Sections were rinsed in phosphate buffered saline (PBS) and treated with 0.6% hydrogen  
165 peroxide in dH2O for 30 minutes. Sections were rinsed and incubated for 24h at 4°C in primary  
166 antibody solution: 1:1000 goat anti-doublecortin (Santa Cruz Biotechnology, Santa Cruz, CA,  
167 USA), 0.04% Triton-X in PBS, and 3% normal rabbit serum. Sections were then rinsed and  
168 incubated in secondary antibody solution for 24h at 4°C: 1:1000 rabbit anti-goat (Vector  
169 Laboratories, Burlington, ON, Canada) in 0.1M PBS. Then, sections were rinsed and incubated  
170 in an avidin-biotin complex (ABC Elite Kit, 1:1000, Vector Laboratories) in PBS for 2hr.  
171 Sections were rinsed and subsequently 2 x 2min in 0.175M sodium acetate buffer.  
172 Immunoreactants were visualized using diaminobenzadine (DAB) in the presence of nickel  
173 (DAB peroxidase substrate kit, Vector), mounted on slides, dried, dehydrated and coverslipped.

174

## 175 2.6. Ki67 Immunohistochemistry

176 Sections were rinsed in phosphate buffered saline (PBS) and treated with 0.6% hydrogen  
177 peroxide in dH<sub>2</sub>O for 30 minutes. Sections were rinsed and incubated for 45 minutes at 90°C in  
178 2X saline-sodium citrate buffer. Sections were rinsed with PBS and then incubated for 1 hour at  
179 room temperature in 2% normal horse serum and 0.2% Triton-X in PBS. Sections were rinsed  
180 with PBS and incubated for 20 hours at 4°C in primary antibody solution 1:3000 mouse anti-  
181 Ki67 (BD Biosciences, San Jose, CA, USA), 2% normal horse serum, and 0.2% Triton-X in  
182 PBS. Sections were then rinsed with PBS and incubated for 1 hour at room temperature in  
183 secondary antibody solution 1:1000 anti-mouse (Vector Laboratories, Burlington, ON, Canada),  
184 2% normal horse serum, and 0.1% bovine serum albumin in PBS. Sections were then rinsed in  
185 PBS and incubated for 1 hour at room temperature in avidin-biotin complex (ABC Elite Kit,  
186 1:500, Vector Laboratories, Burlington, ON, Canada) in PBS. Sections were rinsed with PBS.  
187 Immunoreactants were visualized using diaminobenzidine (DAB peroxidase substrate kit,  
188 Vector) and rinsed with PBS. Sections were then mounted on slides, dried, dehydrated, and  
189 coverslipped.

190

## 191 2.7 Microscopy, cell quantification, and cell phenotyping

192 An investigator blinded to treatment condition quantified DCX- and Ki67-expressing  
193 cells. DCX-expressing cells were quantified in the granule cell layer of the dentate gyrus in every  
194 10<sup>th</sup> section along the rostral-caudal axis, using the 40x objective on an Olympus CX22LED  
195 brightfield microscope. Raw counts were multiplied by 10 to get an estimate of the total number  
196 of DCX-expressing cells, separately in dorsal and ventral regions. Ki67-expressing cells were  
197 quantified in the granule cell layer of two dorsal and two ventral slices along the rostral-caudal  
198 axis, using the 100x objective on a Nikon E600 microscope. Areas of the granule cell layer of  
199 each slice counted were quantified using ImageJ (NIH, Bethesda, MD) and used for density  
200 calculations (number of cells per mm<sup>3</sup>).

201 DCX morphology (Figure 2A) was analyzed using the 100× objective on an Olympus  
202 CX22LED brightfield microscope. 50 DCX-expressing cells (25 dorsal GCL and 25 ventral  
203 GCL) were randomly selected for each animal, and categorized into one of three maturational  
204 stages based on previously established criteria (Plumpe et al. 2006): proliferative (no process or  
205 short process), intermediate (medium process with no branching), or post-mitotic (long processes  
206 with branching into the GCL and molecular layer).

207

## 208 2.8 Determination of estrous cycle phase and serum 17β-estradiol levels

209 Vaginal cells were collected by lavage on days 17-21 of the experimental timeline.  
210 Estrous cycle phase was determined as described previously (Brummelte and Galea, 2010).  
211 Serum 17β-estradiol was quantified by radioimmunoassay kit according to manufacturer's  
212 instructions (DSL-4800 Ultra-sensitive Estradiol RIA, Beckmann Coulter, Missisauga, ON).

213

## 214 2.9 Data Analyses

215 All statistical analyses were performed using Statistica software (Tulsa, OK). Behavioral  
216 tests (TST, FST), density of Ki67- and DCX-expressing cells, and morphology of DCX-  
217 expressing cells were each analyzed using repeated measures analysis of variance (ANOVA)  
218 with drug treatment (letrozole or vehicle) as the between-subjects factor and behavior (immobile,  
219 mobile), region (dorsal, ventral) or cell type (type 1,2,3) as within-subjects factor with age as a



220 covariate. Serum  $17\beta$ -estradiol levels, uterine mass and adrenal mass were analyzed using a  
221 student's t-test. Percent sucrose preference and percent change in body mass were analyzed with  
222 a repeated measures ANOVA with drug treatment as the between-subjects factor and week as the  
223 within-subjects factor. Post-hoc analyses used the Newman-Keuls test, and a priori tests utilized  
224 Bonferroni corrections. We also tested for violations of normality (Kolmogorov-Smirnov test)  
225 and homogeneity of variance for each variable. These assumptions were not violated, so  
226 parametric statistics were conducted. Pearson product moment correlations were also conducted  
227 on variables of interest.

### 228 3. Results

#### 229 3.1 Letrozole upregulated the density of immature neurons (DCX-expressing cells) and cell 230 proliferation (Ki67-expressing cells) in the dentate gyrus

231  
232 Letrozole treatment significantly increased the density of DCX-expressing cells (main effect  
233 of treatment ( $F(1,16)=8.12$ ,  $p<0.011$ ,  $\eta_p^2=0.34$ ) in the granule cell layer of the dentate gyrus  
234 (Figure 1C). Indeed, letrozole treatment increased the density of DCX-expressing cells in the  
235 ventral ( $p=0.004$ ; cohen's  $d=1.09$ ; Figure 1C) more so than the dorsal region ( $p=0.06$ , Cohen's  
236  $d=0.20$ ; Figure 1D). Overall there were more DCX-expressing cells in the dorsal compared to the  
237 ventral region (main effect of region:  $p=0.02$ ,  $\eta_p^2=0.22$ ).

238 Letrozole treatment increased the number of Ki67-expressing cells, regardless of region  
239 (main effect of treatment  $F(1,17)=6.28$ ,  $p=0.023$ ,  $\eta_p^2=0.27$ ; Figure 2C). There were no other  
240 significant main or interaction effects ( $p$ 's $>0.3$ ). Because proestrous state can increase cell  
241 proliferation (Tanapat et al., 1999) we ran a t-test to determine if proestrous state was associated  
242 with increased Ki67-expressing cells but this was not significant ( $t(17)=1.59$ ,  $p=0.13$ ).

#### 243 244 3.2 Letrozole decreased the proportion of proliferative DCX-expressing cells and increased the 245 proportion of more mature DCX-expressing cells in the ventral dentate gyrus

246 A priori analysis revealed letrozole decreased the percentage of proliferative (type 1, Figure  
247 2B) DCX-expressing cells compared to saline in the ventral region ( $p<0.012$ ; Cohen's  $d=1.17$ )  
248 but not the dorsal region ( $p=0.77$ ; Cohen's  $d=0.12$ ). There was a non-statistically significant  
249 increase in the proportion of intermediate (type 2, Figure 2B) DCX-expressing cells ( $p=0.06$ ) in  
250 the letrozole-treated mice, but no other statistically significant differences between groups ( $p$ 's  
251  $>0.2$ ).

252

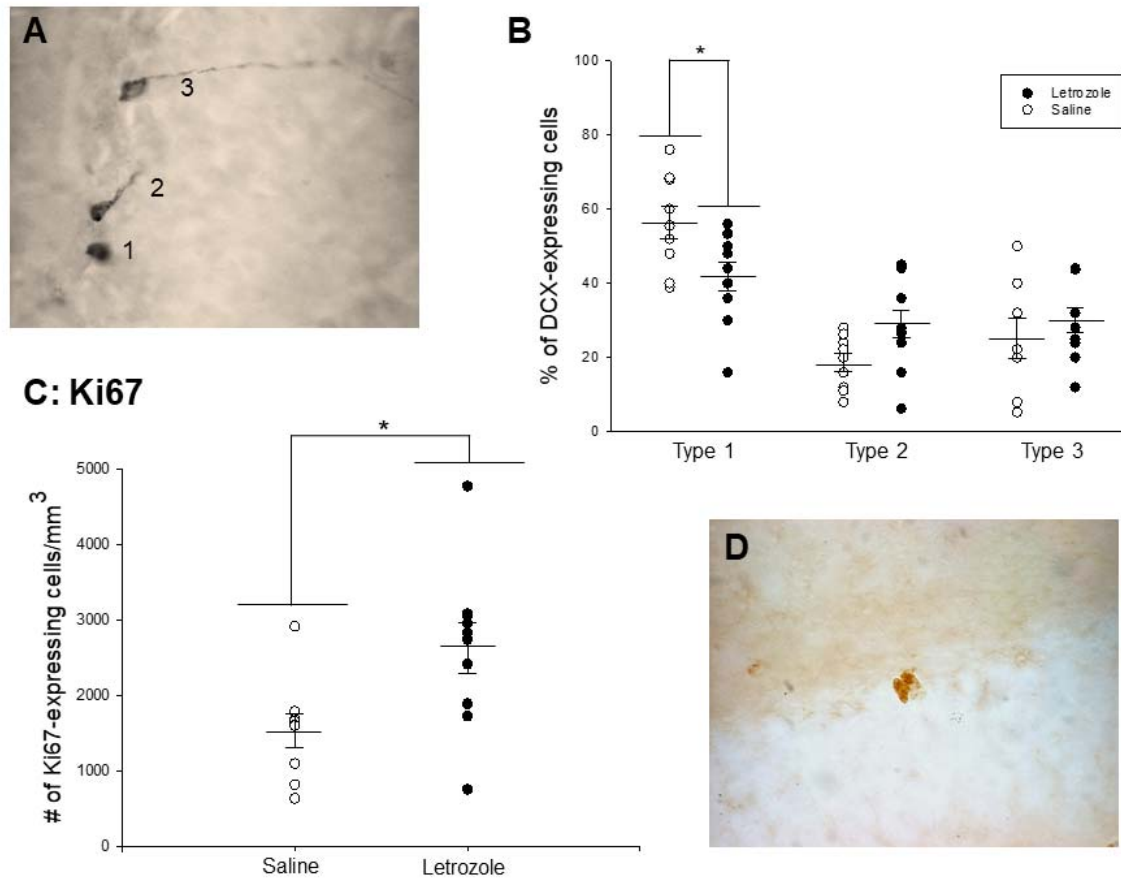

253  
254 Figure 2 A) Photomicrograph at 1000x of the three types of DCX-expressing cells based on  
255 morphology: Type 1 cell, proliferative; Type 2 cell, intermediate; Type 3 cell, post-mitotic,  
256 modified definitions from Plumpe et al., 2006. B) Percentage of DCX-expressing cells in the DG  
257 in each maturational stage. Letrozole decreased the proportion of type 1 (proliferative) DCX-  
258 expressing cells compared to controls, with a non-significant increase the proportion of type 2  
259 (intermediate) DCX-expressing cells ( $p < 0.06$ ). C) Mean density of ki67-expressing cells in the  
260 dentate gyrus. Letrozole significantly increased the total density of ki67-expressing cells)  
261 Photomicrograph taken at 1000x of a cluster of Ki67-expressing cells.  $*p < 0.05$ .  $\pm$  SEM.  
262

### 263 3.3 Letrozole had no significant effect on behavior in the SPT, TST, and FST

264 In the FST, TST, or SPT there were no significant differences in behaviors between groups  
265 (all  $p$ 's  $> 0.15$ , Figure 3A-C).



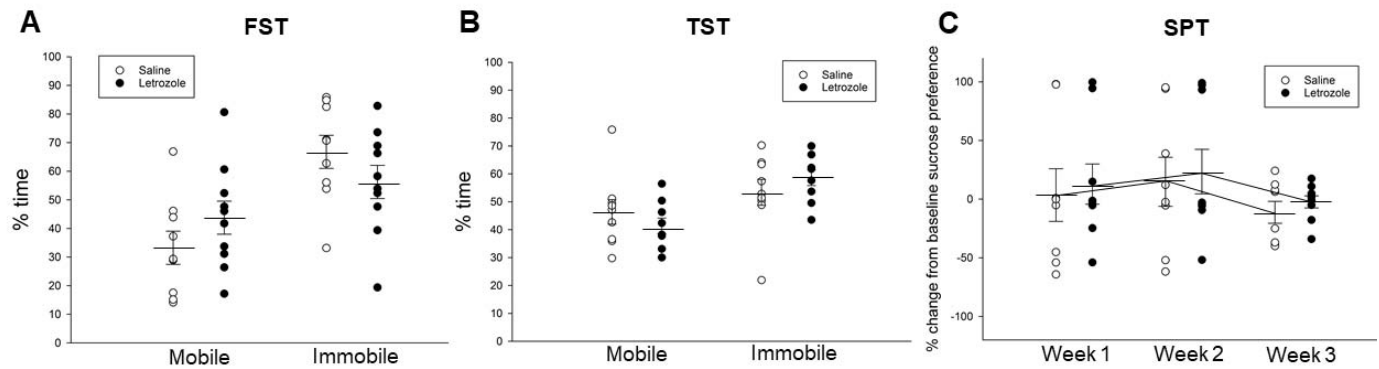

266

267 **Figure 3 A-C:** Letrozole had no significant effect on any measure of depressive-like behavior  
 268 (all  $p$ 's > 0.15). A) Percent time spent mobile and immobile in the forced swim test. B) Percent  
 269 time spent mobile and immobile in the tail suspension test. C) Percent change from baseline  
 270 sucrose preference over 3 weeks of the sucrose preference test.  $\pm$ SEM.

271

272 3.4 Letrozole significantly decreased uterine mass and serum  $17\beta$ -estradiol levels, but did not  
 273 influence estrous cycle

274

275 Letrozole-treated mice had significantly lower uterine mass than controls ( $t(17)=2.55$ ,  
 276  $p=0.02$ ; Cohen's  $d=0.966$ ; Table 1). Consistent with this outcome, letrozole decreased  $17\beta$ -  
 277 estradiol levels (letrozole:  $14.4 \pm 1.5$ ) compared to controls ( $18.9 \pm 1.9$ ;  $t(8)=1.78$ ,  $p=.05$ , one-  
 278 tailed, Cohen's  $d=1.15$ ). The values of estradiol were low likely due to age. There was no  
 279 significant effect of letrozole on body mass from baseline to the last day or adrenal mass ( $p$ 's >  
 280 0.41; Table 1). In the saline group, 6 mice were in constant diestrus, 2 in estrus and 1 was  
 281 cycling, while in the letrozole group 4 were in constant diestrus, 4 in constant estrus and 2 were  
 282 cycling. These distributions were not significantly different according to a chi-square ( $\chi^2=1.35$ ,  
 283  $p=0.51$ ). There were no significant effects of letrozole to influence body or adrenal mass ( $p$ 's <  
 284 0.11; Table 1).

285 Table 1. Serum  $17\beta$ -estradiol concentrations, body, and organ mass across both groups.  
 286 Letrozole decreased uterine mass and serum  $17\beta$ -estradiol levels.

|                        | Saline           | Letrozole           |
|------------------------|------------------|---------------------|
| Uterine mass (g)       | $0.06 \pm 0.005$ | $0.045 \pm 0.005^*$ |
| Body Mass (g) baseline | $26.3 \pm 0.66$  | $25.65 \pm 0.81$    |
| Body Mass (g) last day | $26.3 \pm 0.55$  | $26.05 \pm 0.95$    |

|                                     |               |              |
|-------------------------------------|---------------|--------------|
| <b>Adrenal mass (g)</b>             | 0.0063±0.0008 | 0.007±0.0002 |
| <b>17β-estradiol levels (pg/ml)</b> | 18.9±1.9      | 14.4± 1.5*   |

287

288 \* Significantly different from saline-treated groups.

289 3.5 Correlations

290 There were no significant correlations between neurogenesis markers and behavior (P's >0.3).

291 4. Discussion

292 We found that letrozole increased the density of immature neurons in the ventral dentate  
293 gyrus of middle aged females. This is consistent with findings that long-term ovariectomy in  
294 middle-aged female rats increased, while estrogens decreased the survival of immature neurons  
295 (Barha et al., 2015). Additionally, we found that letrozole lowered the proportion of the least  
296 mature DCX-expressing neurons. This suggests that letrozole increased the rate of maturation of  
297 immature neurons, promoting survival past the proliferative phase into the intermediate and post-  
298 mitotic phase, consistent with a trend for letrozole to increase type 2 DCX-expressing cells. As  
299 DCX is expressed for 28 days in mice (Snyder et al., 2009), this would have entailed that some  
300 of the more mature cells were produced without letrozole exposure. However, when we  
301 examined cell proliferation using the endogenous marker Ki67, we found that letrozole increased  
302 cell proliferation in the dentate gyrus, regardless of region. Ki67 is expressed for approximately  
303 24 h in every part of the cell mitotic cycle except for G<sub>0</sub> and the initial stages of G<sub>1</sub>. The  
304 discrepancy between the length of expression of Ki67 and DCX (1 day and up to 28 days,  
305 respectively), likely accounts for the opposing effects seen on DCX-expressing type 1 cells  
306 versus Ki67-expressing, as type 1 cells likely expressed DCX for a longer timeframe. It is also  
307 important to acknowledge that Ki67 may have been influenced by TST, whereas type 1 DCX  
308 cells could have been influenced throughout the last 4 days of behavior testing. It is also possible  
309 that the stress effects associated with behavior testing could influence Ki67 expression.  
310 However, females do not normally show a decrease in cell proliferation in response to acute  
311 stress (Falconer and Galea, 2003, Tzeng et al., 2014), unlike males (Falconer and Galea, 2003,  
312 Tzeng et al., 2014). Finally, we find no significant correlations between Ki67-expression and  
313 immobility in the TST or FST. The lack of association between variables suggests that the stress  
314 of testing did not influence Ki67 expression in middle-aged female mice.

315 Studies from the Rune laboratory have found that letrozole decreases cell proliferation in  
316 hippocampal cultures taken from postnatal day 5 Wistar rats (Fester et al., 2006) and decreases  
317 synapses in immature (postnatal day 9) and adult intact female Wister rats (Bender et al., 2010).  
318 These findings are consistent with our findings that letrozole decreased the percentage of  
319 proliferative (Type 1) DCX-expressing cells, but inconsistent with our results that chronic  
320 letrozole increased cell proliferation (Ki67-expressing cells). However, these findings taken all  
321 together, suggest that there are age and possibly sex-related differences in the effects of letrozole  
322 on cell proliferation and neurogenesis in the hippocampus. Future studies should determine the

323 impact of chronic letrozole on the survival of new neurons independent of its effects on cell  
324 proliferation, in an age- and sex-dependent manner.

325 Interestingly, letrozole's effects on the density of DCX-expressing cells were seen  
326 exclusively in the ventral hippocampus. The ventral hippocampus is implicated in modulating  
327 stress and affect (Fanselow and Dong, 2010). Curiously, survival of new neurons in females is  
328 increased in the ventral hippocampus with trace eyeblink conditioning involving a shock (Dalla  
329 et al. 2009), but not after pattern separation (Yagi et al., 2016) or Morris water maze training  
330 (Chow et al., 2013). It would be interesting to examine whether the increase in cell proliferation  
331 with letrozole affects fear or appetitive-based conditioning and cognition. Given this, coupled  
332 with our lack of findings on affective behavioral measures, it suggests neural consequences of  
333 letrozole may be seen either prior to any affective behavioral changes, or on different types of  
334 behavior with more prolonged letrozole exposure.

335 Chronic letrozole had no significant effect on measures of depressive-like behavior  
336 (FST, TST, SPT) in the present study, consistent with other studies examining immobility in the  
337 FST (Kokras et al., 2018, 2014; Meng et al., 2011). However, acute letrozole in young,  
338 ovariectomized female rats had an antidepressant effect in the FST, while chronic letrozole had  
339 no such effect (Kokras et al., 2014). Chronic letrozole in young, ovariectomized mice increased  
340 anxiety in the open field test and elevated plus maze (Meng et al., 2011) while chronic letrozole  
341 in middle-aged cycling female rats had no effect on anxiety in the elevated plus maze  
342 (Borbélyová et al., 2017). Collectively these results suggest that chronic letrozole treatment has  
343 no significant effect on depressive-like behavior in middle-aged females. Our values in  
344 immobility in the FST were high even for saline-injected females (~60%) which is much  
345 different from control values for FST in female rats of approximately 20% immobility  
346 (Mahmoud et al., 2016). However, our findings are consistent with data in mice with studies  
347 indicating levels of immobility in untreated mice around 50-90% of immobility (Akanmuet al  
348 2007; Can et al., 2012; Frye, 2011, Liou et al., 2012). There are known differences between mice  
349 and rats in the FST (Molendijk and de Kloet ER, 2019) but to our knowledge no one has  
350 described the differences in baseline immobility time as a function of mice versus rats. In the  
351 future, the issue of interpretation of the FST would benefit from a careful review of the literature  
352 on FST findings in mice versus rats. Future studies should consider the effects of letrozole on  
353 depressive-like behavior in the context of a challenge such as chronic stress or cancer, because  
354 situations that increase inflammation could impact the effects of letrozole and may provide more  
355 robust effects on behavior.

356 It is possible that an increase in testosterone that accompanies aromatase inhibition is  
357 responsible for mitigating negative behavioral effects of estrogen depletion. We did attempt to  
358 measure serum testosterone in this study, but the levels in serum were below detection threshold  
359 in middle-aged females and future studies should examine testosterone levels in brain after  
360 chronic letrozole treatment in middle-aged female mice. Castrated male rats are more susceptible  
361 to developing depressive-like endophenotypes following chronic stress (Wainwright et al.,  
362 2011). Similarly, in men, hypogonadism is associated with depressive symptoms, and androgen  
363 treatment can ameliorate these symptoms (Zarrouf et al., 2009). Furthermore, testosterone given  
364 to surgically menopausal women can elevate mood (Sherwin, 1988). Further studies could  
365 evaluate the role of testosterone on mood after aromatase inhibition in middle-aged females.  
366 Finally, in our study we saw no significant effects of letrozole on depressive-like or coping  
367 strategies in middle-aged females, but other studies have seen effects of acute letrozole on

368 memory in female mice (Tuscher et al., 2016) and the testing of the effects of chronic letrozole  
369 on decision making may be warranted.

370

## 371 5. Conclusion

372

373 We demonstrate that in middle-aged female mice, chronic letrozole increased  
374 hippocampal neurogenesis but had no effect on depressive-like behavior. Future studies could  
375 investigate more behaviors that may be regulated by ventral neurogenesis in the hippocampus  
376 such as fear motivated learning (Dalla et al., 2009). Furthermore, it is important for studies to  
377 investigate the mechanisms behind potential neuropsychiatric effects of aromatase inhibitors on  
378 middle-aged women, which may shed light on the impact of adjuvant cancer treatments on  
379 quality of life.

380

## 381 Acknowledgements

382

383 We gratefully acknowledge funding from Canadian Institutes of Health Research (MOP 142308)  
384 to LAMG and a Faculty of Medicine award (Summer Student Research Program) at University  
385 of British Columbia for salary to JC.

386

387 References

- 388 Aydin, M., Yilmaz, B., Alcin, E., Nedzvetsky, V.S., Sahin, Z., Tuzcu, M., 2008. Effects of  
389 letrozole on hippocampal and cortical catecholaminergic neurotransmitter levels, neural cell  
390 adhesion molecule expression and spatial learning and memory in female rats. *Neuroscience* 151,  
391 186–194. <https://doi.org/10.1016/j.neuroscience.2007.09.005>
- 392 Barha, C.K., Lieblich, S.E., Chow, C., Galea, L.A.M., 2015. Multiparity-induced enhancement  
393 of hippocampal neurogenesis and spatial memory depends on ovarian hormone status in middle  
394 age. *Neurobiol. Aging* 36, 2391–2405. <https://doi.org/10.1016/j.neurobiolaging.2015.04.007>
- 395 Bender RA1, Zhou L, Wilkars W, Fester L, Lanowski JS, Paysen D, König A, Rune GM. Roles  
396 of 17 $\beta$ -estradiol involve regulation of reelin expression and synaptogenesis in the dentate gyrus.  
397 *Cereb Cortex*. 2010 Dec;20(12):2985-95.
- 398 Boldrini, M., Hen, R., Underwood, M.D., Rosoklija, G.B., Dwork, A.J., Mann, J.J., Arango, V.,  
399 2012. Hippocampal Angiogenesis and Progenitor Cell Proliferation Are Increased with  
400 Antidepressant Use in Major Depression. <https://doi.org/10.1016/j.biopsych.2012.04.024>
- 401 Borbélyová, V., Domonkos, E., Csongová, M., Kačmárová, M., Ostatníková, D., Celec, P.,  
402 Hodosy, J., 2017. Sex-dependent effects of letrozole on anxiety in middle-aged rats. *Clin. Exp.*  
403 *Pharmacol. Physiol.* 44, 93–98. <https://doi.org/10.1111/1440-1681.12731>
- 404 Brummelte, S., Galea, L.A.M., 2010. Chronic high corticosterone reduces neurogenesis in the  
405 dentate gyrus of adult male and female rats. *Neuroscience* 168, 680–690.  
406 <https://doi.org/10.1016/J.NEUROSCIENCE.2010.04.023>
- 407 Can, A., Dao, D.T., Terrillion, C.E., Piantadosi, S.C., Bhat, S., Gould, T.D., 2012. The tail  
408 suspension test. *J. Vis. Exp.* e3769. <https://doi.org/10.3791/3769>
- 409 Can, A., Dao, D.T., Arad, M., Terrillion, C.E., Piantadosi, S.C., Gould, T.D., 2011. The Mouse  
410 Forced Swim Test. *J. Vis. Exp.* e3638. <https://doi.org/10.3791/3638>
- 411 Chang, C.-H., Chen, S.-J., Liu, C.-Y., 2015. Adjuvant treatments of breast cancer increase the  
412 risk of depressive disorders: A population-based study. *J. Affect. Disord.* 182, 44–49.  
413 <https://doi.org/10.1016/j.jad.2015.04.027>
- 414 Chow, C., Epp, J.R., Lieblich, S.E., Barha, C.K., Galea, L.A.M., 2013. Sex differences in  
415 neurogenesis and activation of new neurons in response to spatial learning and memory.  
416 *Psychoneuroendocrinology* 38, 1236–1250. <https://doi.org/10.1016/j.psyneuen.2012.11.007>
- 417 Dalla, C., Papachristos, E.B., Whetstone, A.S., Shors, T.J., 2009. Female rats learn trace  
418 memories better than male rats and consequently retain a greater proportion of new neurons in  
419 their hippocampi. *Proc. Natl. Acad. Sci. U. S. A.* 106, 2927–32.  
420 <https://doi.org/10.1073/pnas.0809650106>
- 421 Falconer, E.M., Galea, L.A.M., 2003. Sex differences in cell proliferation, cell death and  
422 defensive behavior following acute predator odor stress in adult rats. *Brain Res.* 975, 22–36.

- 423 Fanselow, M.S., Dong, H.W., 2010. Are the Dorsal and Ventral Hippocampus Functionally  
424 Distinct Structures? *Neuron* 65, 7–19. <https://doi.org/10.1016/j.neuron.2009.11.031>
- 425 Fester, L., Ribeiro-Gouveia, V., Prange-Kiel, J., von Schassen, C., Bottner, M., Jarry, H., Rune,  
426 G.M., 2006. Proliferation and apoptosis of hippocampal granule cells require local oestrogen  
427 synthesis. *J. Neurochem.* 97, 1136–1144. <https://doi.org/10.1111/j.1471-4159.2006.03809.x>
- 428 Frokjaer, V.G., Pinborg, A., Holst, K.K., Overgaard, A., Henningsson, S., Heede, M., Larsen,  
429 E.C., Jensen, P.S., Agn, M., Nielsen, A.P., Stenbæk, D.S., da Cunha-Bang, S., Lehel, S., Siebner,  
430 H.R., Mikkelsen, J.D., Svarer, C., Knudsen, G.M., 2015. Role of Serotonin Transporter Changes  
431 in Depressive Responses to Sex-Steroid Hormone Manipulation: A Positron Emission  
432 Tomography Study. *Biol. Psychiatry* 78, 534–543.  
433 <https://doi.org/10.1016/j.biopsych.2015.04.015>
- 434 Green, A.D., Galea, L.A.M., 2008. Adult hippocampal cell proliferation is suppressed with  
435 estrogen withdrawal after a hormone-simulated pregnancy.  
436 <https://doi.org/10.1016/j.yhbeh.2008.02.023>
- 437 Gross, M., Pinhasov, A., 2016. Chronic mild stress in submissive mice: Marked polydipsia and  
438 social avoidance without hedonic deficit in the sucrose preference test. *Behav. Brain Res.* 298,  
439 25–34. <https://doi.org/10.1016/j.bbr.2015.10.049>
- 440 Ingberg, E., Theodorsson, A., Theodorsson, E., Strom, J.O., 2012. Methods for long-term 17 $\beta$ -  
441 estradiol administration to mice. *Gen. Comp. Endocrinol.* 175, 188–93.  
442 <https://doi.org/10.1016/j.ygcen.2011.11.014>
- 443 Kokras, N., Pastromas, N., Papasava, D., de Bournonville, C., Cornil, C.A., Dalla, C., 2018. Sex  
444 differences in behavioral and neurochemical effects of gonadectomy and aromatase inhibition in  
445 rats. *Psychoneuroendocrinology* 87, 93–107. <https://doi.org/10.1016/j.psyneuen.2017.10.007>
- 446 Kokras, N., Pastromas, N., Porto, T.H., Kafetzopoulos, V., Mavridis, T., Dalla, C., 2014. Acute  
447 but not sustained aromatase inhibition displays antidepressant properties. *Int. J.*  
448 *Neuropsychopharmacol.* 17, 1307–1313. <https://doi.org/10.1017/S1461145714000212>
- 449 Kott, J.M., Mooney-Leber, S.M., Shoubah, F.A., Brummelte, S., 2016. Effectiveness of different  
450 corticosterone administration methods to elevate corticosterone serum levels, induce depressive-  
451 like behavior, and affect neurogenesis levels in female rats. *Neuroscience* 312, 201–214.  
452 <https://doi.org/10.1016/j.neuroscience.2015.11.006>
- 453 Mahmoud, R., Wainwright, S.R., Chaiton, J.A., Lieblich, S.E., Galea, L.A.M., 2016a. Ovarian  
454 hormones, but not fluoxetine, impart resilience within a chronic unpredictable stress model in  
455 middle-aged female rats. *Neuropharmacology* 107, 278–293.  
456 <https://doi.org/10.1016/j.neuropharm.2016.01.033>
- 457 Mahmoud, R., Wainwright, S.R., Galea, L.A.M., 2016b. Sex hormones and adult hippocampal  
458 neurogenesis: Regulation, implications, and potential mechanisms. *Front. Neuroendocrinol.* 41,  
459 129–152. <https://doi.org/10.1016/J.YFRNE.2016.03.002>



- 460 Meng, F.T., Ni, R.J., Zhang, Z., Zhao, J., Liu, Y.J., Zhou, J.N., 2011. Inhibition of oestrogen  
461 biosynthesis induces mild anxiety in C57BL/6J ovariectomized female mice. *Neurosci. Bull.* 27,  
462 241–250. <https://doi.org/10.1007/s12264-011-1014-8>
- 463 Molendijk ML, de Kloet ER. Coping with the forced swim stressor: Current state-of-the-art.  
464 *Behav Brain Res.* 2019;364:1-10.
- 465 Pawluski, J.L., Van Donkelaar, E., Abrams, Z., Houbart, V., Fillet, M., Steinbusch, H.W.M.,  
466 Charlier, T.D., 2014. Fluoxetine dose and administration method differentially affect  
467 hippocampal plasticity in adult female rats. *Neural Plast.* 2014.  
468 <https://doi.org/10.1155/2014/123026>
- 469 Plümpe, T., Ehninger, D., Steiner, B., Klempin, F., Jessberger, S., Brandt, M., Römer, B.,  
470 Rodriguez, G.R., Kronenberg, G., Kempermann, G., 2006. Variability of doublecortin-associated  
471 dendrite maturation in adult hippocampal neurogenesis is independent of the regulation of  
472 precursor cell proliferation. *BMC Neurosci.* 7. <https://doi.org/10.1186/1471-2202-7-77>
- 473 Saeedi Saravi, S.S., Arefidoust, A., Yaftian, R., Saeedi Saravi, S.S., Dehpour, A.R., 2016. 17 $\alpha$ -  
474 ethinyl estradiol attenuates depressive-like behavior through GABAA receptor  
475 activation/nitric pathway blockade in ovariectomized mice. *Psychopharmacology (Berl)*. 233,  
476 1467–85. <https://doi.org/10.1007/s00213-016-4242-9>
- 477 Sherwin, B.B., 1988. Affective changes with estrogen and androgen replacement therapy in  
478 surgically menopausal women. *J. Affect. Disord.* 14, 177–187. [https://doi.org/10.1016/0165-0327\(88\)90061-4](https://doi.org/10.1016/0165-0327(88)90061-4)
- 480 Snyder, J.S., Choe, J.S., Clifford, M.A., Jeurling, S.I., Hurley, P., Brown, A., Kamhi, J.F.,  
481 Cameron, H.A., 2009. Adult-Born Hippocampal Neurons Are More Numerous, Faster Maturing,  
482 and More Involved in Behavior in Rats than in Mice. *J. Neurosci.* 29, 14484–14495.  
483 <https://doi.org/10.1523/JNEUROSCI.1768-09.2009>
- 484 Strekalova, T., Gorenkova, N., Schunk, E., Dolgov, O., Bartsch, D., 2006. Selective effects of  
485 citalopram in a mouse model of stress-induced anhedonia with a control for chronic stress.  
486 *Behav. Pharmacol.* 17, 271–87.
- 487 Tuscher JJ, Szinte JS, Starrett JR, Krentzel AA, Fortress AM, Remage-Healey L, Frick KM.  
488 Inhibition of local estrogen synthesis in the hippocampus impairs hippocampal memory  
489 consolidation in ovariectomized female mice. *Horm Behav.* 2016;83:60-67.
- 490 Tzeng, W.-Y., Chen, L.-H., Cherng, C.G., Tsai, Y.-N., Yu, L., 2014. Sex differences and the  
491 modulating effects of gonadal hormones on basal and the stressor-decreased newly proliferative  
492 cells and neuroblasts in dentate gyrus. *Psychoneuroendocrinology* 42, 24–37.  
493 <https://doi.org/10.1016/j.psyneuen.2014.01.003>
- 494 Wainwright, S.R., Barha, C.K., Hamson, D.K., Epp, J.R., Chow, C., Lieblich, S.E., Rutishauser,  
495 U., Galea, L.A., 2016. Enzymatic Depletion of the Polysialic Acid Moiety Associated with the  
496 Neural Cell Adhesion Molecule Inhibits Antidepressant Efficacy. *Neuropsychopharmacology* 41,  
497 1670–80. <https://doi.org/10.1038/npp.2015.337>

498 Wainwright, S.R., Lieblich, S.E., Galea, L.A.M., 2011. Hypogonadism predisposes males to the  
499 development of behavioural and neuroplastic depressive phenotypes. *Psychoneuroendocrinology*  
500 36, 1327–1341. <https://doi.org/10.1016/j.psyneuen.2011.03.004>

501 Yagi, S., Chow, C., Lieblich, S.E., Galea, L.A.M.M., 2016. Sex and strategy use matters for  
502 pattern separation, adult neurogenesis, and immediate early gene expression in the hippocampus.  
503 *Hippocampus* 26, 87–101. <https://doi.org/10.1002/hipo.22493>

504 Zarrouf, F.A., Artz, S., Griffith, J., Sirbu, C., Kommor, M., 2009. Testosterone and depression:  
505 systematic review and meta-analysis. *J. Psychiatr. Pract.* 15, 289–305.  
506 <https://doi.org/10.1097/01.pra.0000358315.88931.fc>

507
